# Supplementary material for: Perinatal Bisphenol A Exposure Induces Chronic Inflammation in Rabbit Offspring via Modulation of Gut Bacteria and Their Metabolites
Source: PubMed Central journal article supplement (PMC5634791; doi:10.1128/msystems.00093-17), 2017-10-10
Supplement: sys005172142st3.pdf [file sys005172142st3.pdf]

## Supplementary Tables

**Table S1:** Effect of BPA on litter size and sex ratio

| Dam | Treatment group | Total litter size | stillborn | Live @ post-natal day2 | Males/ litter | Females/ litter |
|-----|-----------------|-------------------|-----------|------------------------|---------------|-----------------|
| 485 | control         | 6                 | 1         | 1                      | 0             | 4               |
| 486 | control         | 6                 | 2         | 4                      | 4             | 2               |
| 487 | control         | 8                 | 0         | 9                      | 7             | 1               |
| 488 | control         | 10                | 0         | 10                     | 4             | 6               |
| 489 | control         | 5                 | 2         | 3                      | 1             | 2               |
| 490 | BPA             | 2                 | 1         | 1                      | 1             | 0               |
| 491 | BPA             | 5                 | 0         | 0                      | 1             | 3               |
| 492 | BPA             | 9                 | 0         | 9                      | 5             | 4               |
| 493 | BPA             | 6                 | 4         | 2                      | 3             | 3               |
| 494 | BPA             | 8                 | 1         | 7                      | 6             | 2               |
