# Supplementary material for: Perinatal Bisphenol A Exposure Induces Chronic Inflammation in Rabbit Offspring via Modulation of Gut Bacteria and Their Metabolites
Source: PubMed Central journal article supplement (PMC5634791; doi:10.1128/msystems.00093-17), 2017-10-10
Supplement: sys005172142st4.pdf [file sys005172142st4.pdf]

**Table S2:** Metabolites identified as differentially expressed between control and BPA-exposed offspring

| RT (min)     | Measured Mass, Da | Calculated Mass, Da | Elemental composition                                                            | Postulated identity          | Fold change | VIP  | Adj p-value |
|--------------|-------------------|---------------------|----------------------------------------------------------------------------------|------------------------------|-------------|------|-------------|
| <b>COLON</b> |                   |                     |                                                                                  |                              |             |      |             |
| 1.25         | 155.066           | 155.069             | C <sub>6</sub> H <sub>9</sub> N <sub>3</sub> O <sub>2</sub>                      | Histidine                    | 0.33        | 1.28 | 0.047       |
| <b>LIVER</b> |                   |                     |                                                                                  |                              |             |      |             |
| 1.25         | 355.152           | 355.155             | C <sub>14</sub> H <sub>23</sub> N <sub>6</sub> O <sub>3</sub><br>S               | S-adenosyl-L-methioninamine  | 1.96        | 0.10 | 0.042       |
| 7.39         | 230.015           | 230.019             | C <sub>5</sub> H <sub>11</sub> O <sub>8</sub> P                                  | Ribulose-5-phosphate         | 2.07        | 0.50 | 0.053       |
| 13.19        | 607.070           | 607.082             | C <sub>17</sub> H <sub>27</sub> N <sub>3</sub> O <sub>1</sub><br>7P <sub>2</sub> | UDP-N-acetyl-glucosamine     | 1.44        | 0.38 | 0.045       |
| 18.59        | 449.306           | 449.314             | C <sub>26</sub> H <sub>43</sub> NO <sub>5</sub>                                  | Glycodeoxycholic acid        | 1.63        | 3.62 | 0.042       |
| 1.22         | 146.066           | 146.069             | C <sub>5</sub> H <sub>10</sub> N <sub>2</sub> O <sub>3</sub>                     | Glutamine                    | 1.04        | 0.95 | 0.053       |
| 1.24         | 89.046            | 89.048              | C <sub>3</sub> H <sub>7</sub> NO <sub>2</sub>                                    | Alanine                      | 1.80        | 0.86 | 0.042       |
| 1.23         | 119.056           | 119.058             | C <sub>4</sub> H <sub>9</sub> NO <sub>3</sub>                                    | Threonine                    | 1.61        | 1.19 | 0.042       |
| 1.23         | 119.056           | 119.058             | C <sub>4</sub> H <sub>9</sub> NO <sub>3</sub>                                    | Homoserine                   | 1.61        | 1.19 | 0.042       |
| 1.29         | 158.041           | 158.044             | C <sub>4</sub> H <sub>6</sub> N <sub>4</sub> O <sub>3</sub>                      | Allantoin                    | 1.62        | 0.45 | 0.01        |
| 15.36        | 154.024           | 154.027             | C <sub>7</sub> H <sub>6</sub> O <sub>4</sub>                                     | 2,3-dihydroxybenzoic acid    | 1.57        | 0.58 | 0.042       |
| 1.25         | 175.092           | 175.096             | C <sub>6</sub> H <sub>13</sub> N <sub>3</sub> O <sub>3</sub>                     | Citrulline                   | 1.48        | 0.17 | 0.053       |
| 7.16         | 172.010           | 172.014             | C <sub>3</sub> H <sub>9</sub> O <sub>6</sub> P                                   | Sn-glycerol-3-phosphate      | 1.55        | 3.40 | 0.059       |
| 9.00         | 169.995           | 169.998             | C <sub>3</sub> H <sub>7</sub> O <sub>6</sub> P                                   | Dihydroxy-acetone-phosphate  | 2.53        | 0.12 | 0.042       |
| 7.51         | 169.995           | 169.998             | C <sub>3</sub> H <sub>7</sub> O <sub>6</sub> P                                   | D-glyceraldehyde-3-phosphate | 2.19        | 0.10 | 0.053       |

Fold Change: Ratio of mean relative amount between the control and BPA groups; Adj P-value:

Wilcoxon rank sum test P-value was adjusted for multiple testing using FDR.
