# Supplementary material for: Perinatal Bisphenol A Exposure Induces Chronic Inflammation in Rabbit Offspring via Modulation of Gut Bacteria and Their Metabolites
Source: PubMed Central journal article supplement (PMC5634791; doi:10.1128/msystems.00093-17), 2017-10-10
Supplement: sys005172142st5.pdf [file sys005172142st5.pdf]

**Table S3:** Receiver operator characteristic curve analysis of significant metabolites – targeted analysis

| Biomarker                    | AUC   | Best cutoff<br>(normalized<br>peak intensity) | Sensitivity | Specificity | Maximum<br>of Youden<br>Index |
|------------------------------|-------|-----------------------------------------------|-------------|-------------|-------------------------------|
| S-adenosyl-L-methioninamine  | 0.634 | 1665220                                       | 0.571       | 0.704       | 0.275                         |
| Ribulose-5-phosphate         | 0.598 | 4.18E+07                                      | 0.629       | 0.593       | 0.221                         |
| UDP-N-acetyl-glucosamine     | 0.614 | 4.27E+07                                      | 0.486       | 0.852       | 0.338                         |
| Glycodeoxycholic acid        | 0.605 | 6.50E+08                                      | 0.457       | 0.778       | 0.235                         |
| Glutamine                    | 0.534 | 1.41E+09                                      | 0.457       | 0.778       | 0.235                         |
| Alanine                      | 0.576 | 1.09E+08                                      | 0.457       | 0.778       | 0.235                         |
| Threonine                    | 0.594 | 2.30E+08                                      | 0.457       | 0.778       | 0.235                         |
| Homoserine                   | 0.594 | 2.30E+08                                      | 0.457       | 0.778       | 0.235                         |
| Allantoin                    | 0.674 | 3.16E+07                                      | 0.600       | 0.778       | 0.378                         |
| Histidine                    | 0.530 | 1.44E+08                                      | 0.429       | 0.778       | 0.206                         |
| 2_3-dihydroxybenzoic acid    | 0.577 | 2.34E+07                                      | 0.800       | 0.482       | 0.282                         |
| Citrulline                   | 0.583 | 9137220                                       | 0.686       | 0.519       | 0.204                         |
| Sn-glycerol-3-phosphate      | 0.535 | 2.09E+09                                      | 0.400       | 0.741       | 0.141                         |
| Dihydroxy-acetone-phosphate  | 0.601 | 3313770                                       | 0.629       | 0.593       | 0.221                         |
| D-glyceraldehyde-3-phosphate | 0.594 | 2566500                                       | 0.714       | 0.519       | 0.233                         |

AUC = area under the curve

\*Sensitivity + specificity – 1
