# Supplementary material for: Perinatal Bisphenol A Exposure Induces Chronic Inflammation in Rabbit Offspring via Modulation of Gut Bacteria and Their Metabolites
Source: PubMed Central journal article supplement (PMC5634791; doi:10.1128/msystems.00093-17), 2017-10-10
Supplement: sys005172142st6.pdf [file sys005172142st6.pdf]

**Table S4:** Pathways that are significantly different between BPA-exposed and control offspring

| Pathway                                     | Total Compounds | Hits | Raw p-value | Adj p-value | Impact |
|---------------------------------------------|-----------------|------|-------------|-------------|--------|
| <b>COLON</b>                                |                 |      |             |             |        |
| Histidine metabolism                        | 44              | 1    | 0.002       | 0.042       | 0.140  |
| beta-Alanine metabolism                     | 28              | 1    | 0.002       | 0.042       | 0.000  |
| <b>LIVER</b>                                |                 |      |             |             |        |
| Selenoamino acid metabolism                 | 22              | 1    | 0.004       | 0.030       | 0.000  |
| Taurine and hypotaurine metabolism          | 20              | 2    | 0.004       | 0.030       | 0.363  |
| Amino sugar and nucleotide sugar metabolism | 88              | 2    | 0.005       | 0.030       | 0.119  |
| Nitrogen metabolism                         | 39              | 4    | 0.005       | 0.030       | 0.008  |
| Primary bile acid biosynthesis              | 47              | 1    | 0.006       | 0.030       | 0.008  |
| Pentose and glucuronate interconversions    | 53              | 2    | 0.008       | 0.030       | 0.006  |
| Galactose metabolism                        | 41              | 2    | 0.008       | 0.030       | 0.001  |
| Glycerolipid metabolism                     | 32              | 2    | 0.008       | 0.030       | 0.000  |
| Starch and sucrose metabolism               | 50              | 1    | 0.008       | 0.030       | 0.139  |
| Ascorbate and aldarate metabolism           | 45              | 1    | 0.008       | 0.030       | 0.000  |
| Pentose phosphate pathway                   | 32              | 1    | 0.010       | 0.035       | 0.098  |
| Aminoacyl-tRNA biosynthesis                 | 75              | 7    | 0.011       | 0.035       | 0.056  |
| Alanine, aspartate and glutamate metabolism | 24              | 3    | 0.015       | 0.038       | 0.310  |
| Arginine and proline metabolism             | 77              | 6    | 0.016       | 0.038       | 0.206  |
| Pyrimidine metabolism                       | 60              | 4    | 0.016       | 0.038       | 0.049  |
| Purine metabolism                           | 92              | 2    | 0.016       | 0.038       | 0.008  |
| Fructose and mannose metabolism             | 48              | 1    | 0.022       | 0.038       | 0.041  |
| Inositol phosphate metabolism               | 39              | 1    | 0.022       | 0.038       | 0.012  |
| Glycolysis or Gluconeogenesis               | 31              | 1    | 0.022       | 0.038       | 0.000  |
| Glycerophospholipid metabolism              | 39              | 1    | 0.022       | 0.038       | 0.000  |
| Pyruvate metabolism                         | 32              | 1    | 0.022       | 0.038       | 0.000  |
| Nicotinate and nicotinamide metabolism      | 44              | 1    | 0.022       | 0.038       | 0.000  |
| Cysteine and methionine metabolism          | 56              | 4    | 0.036       | 0.059       | 0.036  |

Adj p-value: Wilcoxon rank sum test raw p-value was adjusted for multiple comparisons (FDR).

Small p-value and large impact value indicate that the pathway is greatly influenced
